# Supplementary material for: Effect of Frozen-Thawed Embryo Transfer on the Metabolism of Children in Early Childhood
Source: MDPI journal article supplement (doi:10.3390/jcm12062322), 2023-03-16

2-Hydroxy-3-methylbutyric acid  
P=4.6e-03

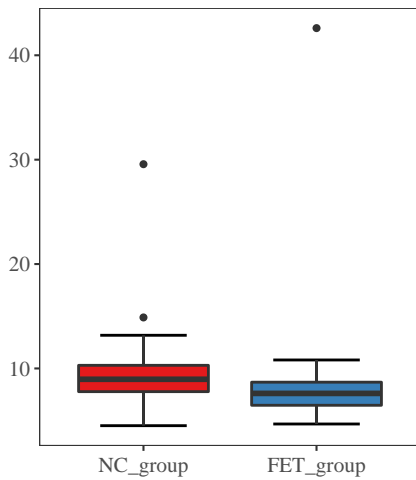

Butyric acid  
P=9.8e-03

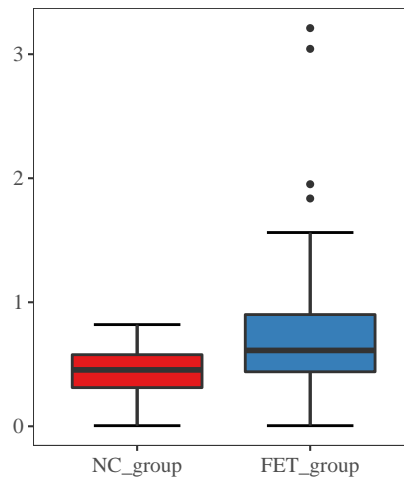

Maleic acid  
P=1.1e-02

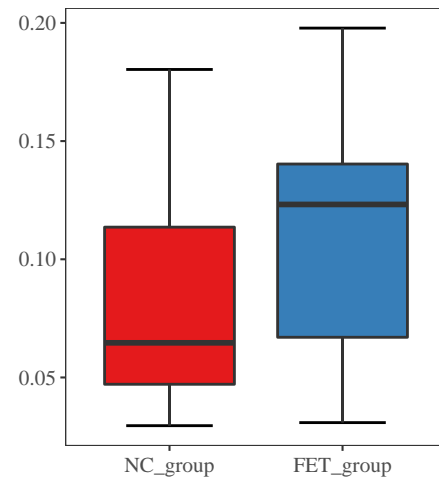

p-Hydroxyphenylacetic acid  
P=1.1e-02

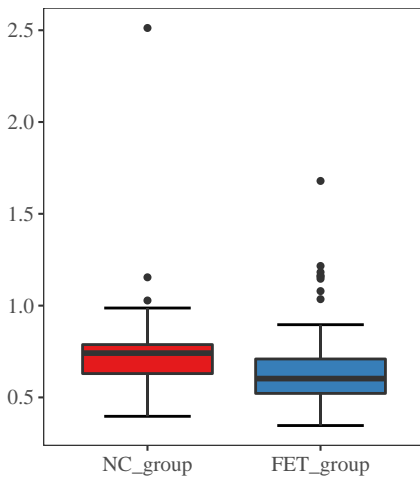

TLCA  
P=1.6e-02

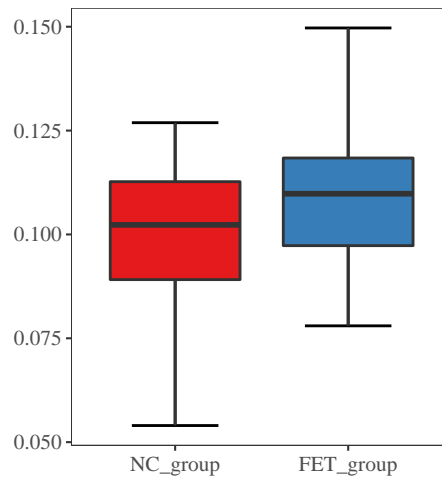

Fructose  
P=2.3e-02

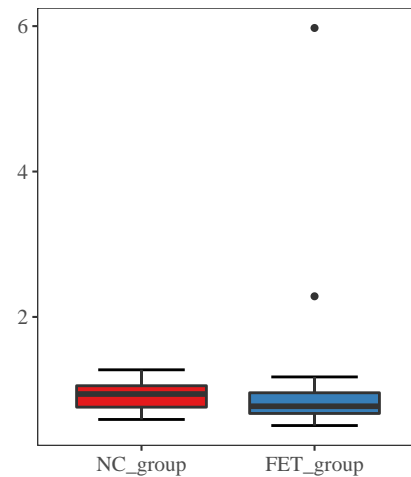

Stearylcarntine  
P=2.6e-02

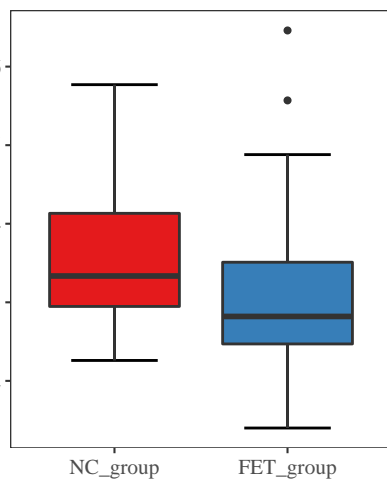

Tyrosine  
P=3.2e-02

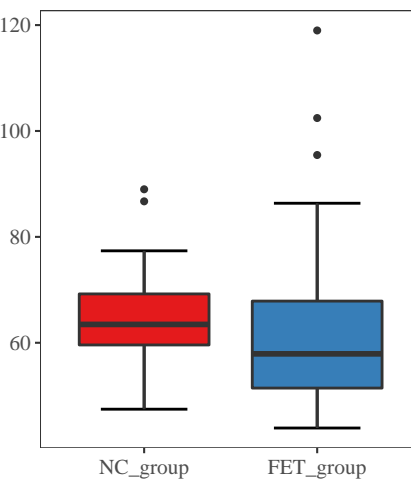

Linoleylcarntine  
P=3.7e-02

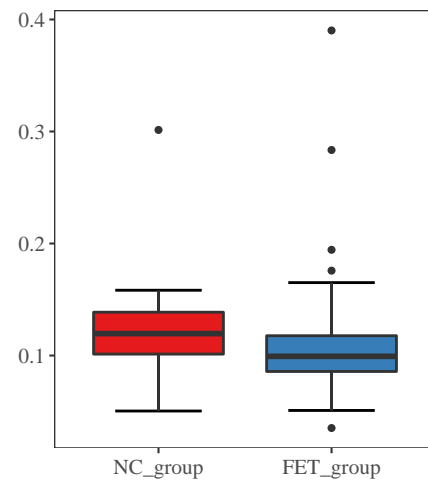

Ornithine  
P=3.8e-02

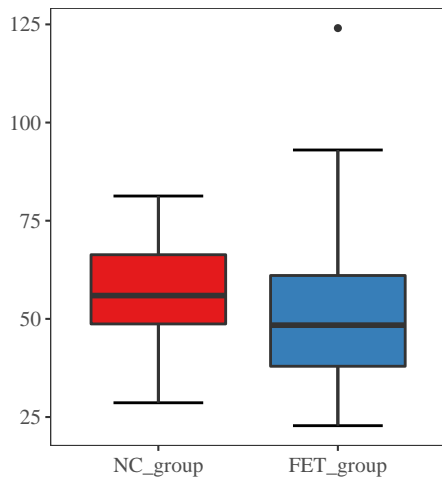

Azelaic acid  
P=3.9e-02

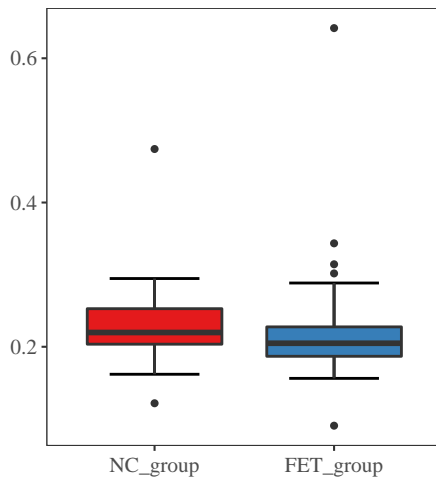

Histidine  
P=4.2e-02

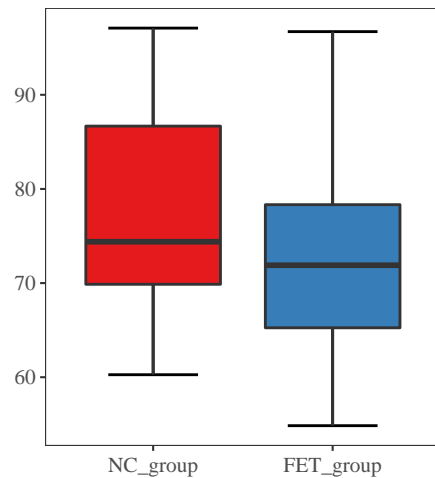

Isocaproic acid  
P=4.4e-02

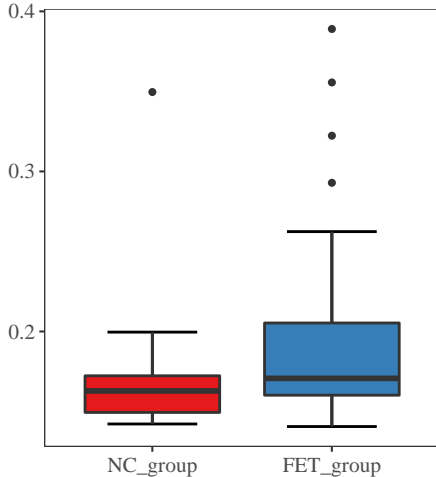

Isocitric acid  
P=4.4e-02

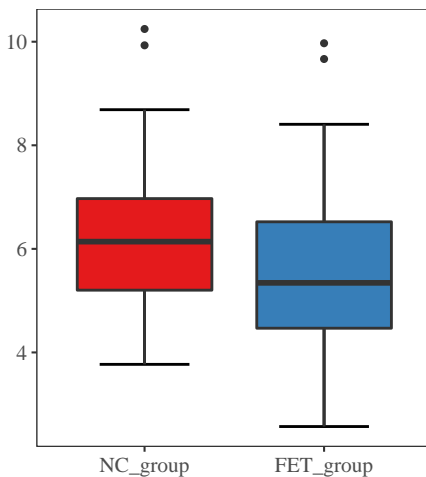

Methylmalonic acid  
P=4.6e-02

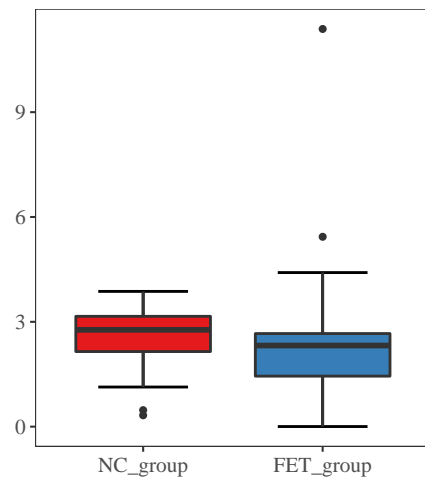

Palmitoylcarnitine  
P=4.9e-02

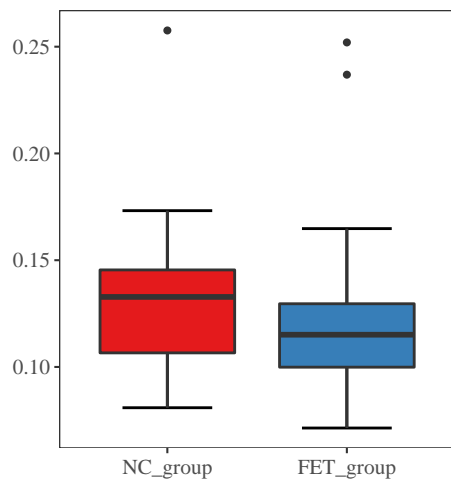

Supplement: s1 [file s1]
