# Supplementary figures and images for: Effect of Frozen-Thawed Embryo Transfer on the Metabolism of Children in Early Childhood
Source: MDPI journal article supplement (doi:10.3390/jcm12062322), 2023-03-16

NC\_group

FET\_group

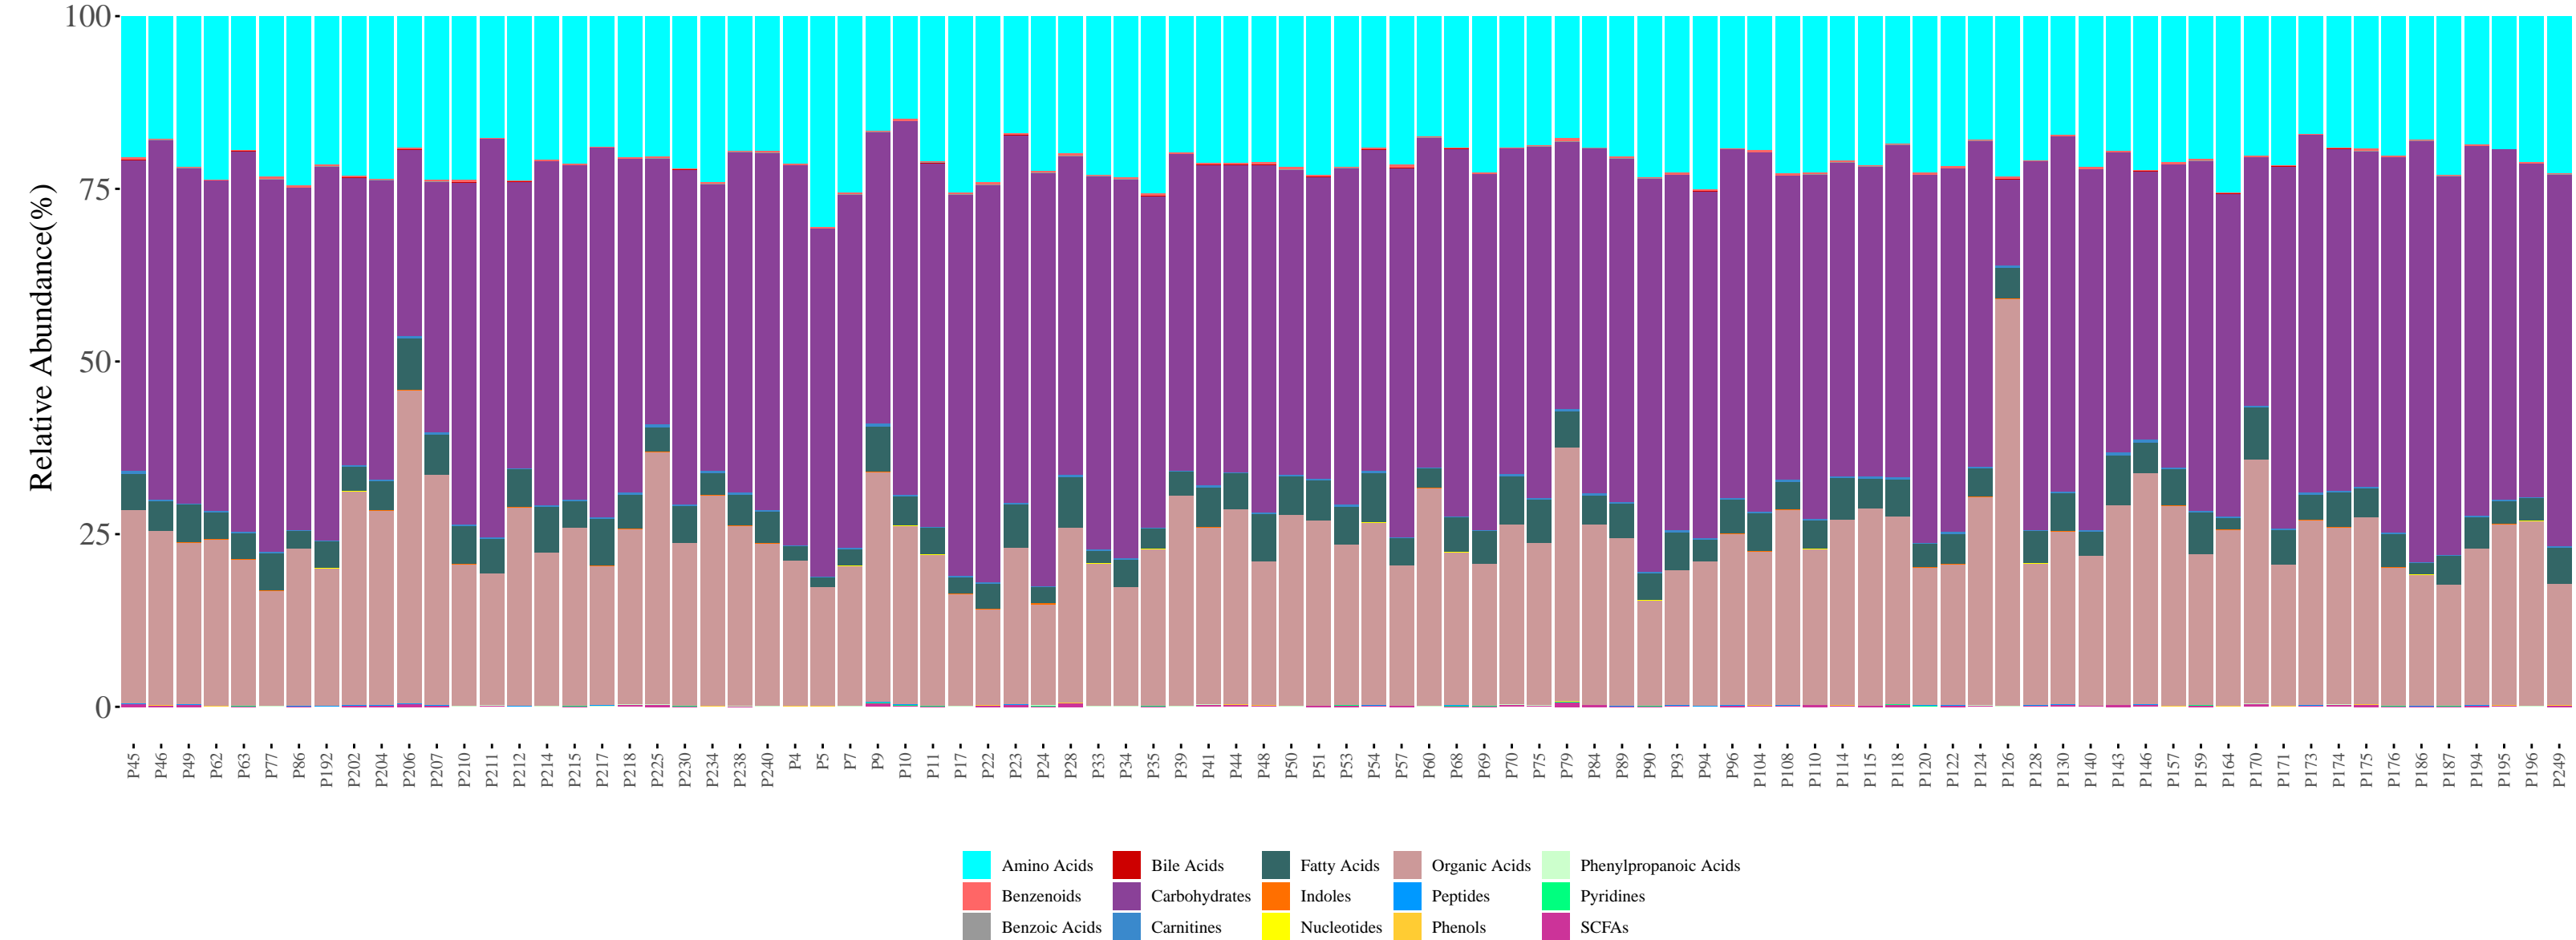

Supplement: s1 [file s1]

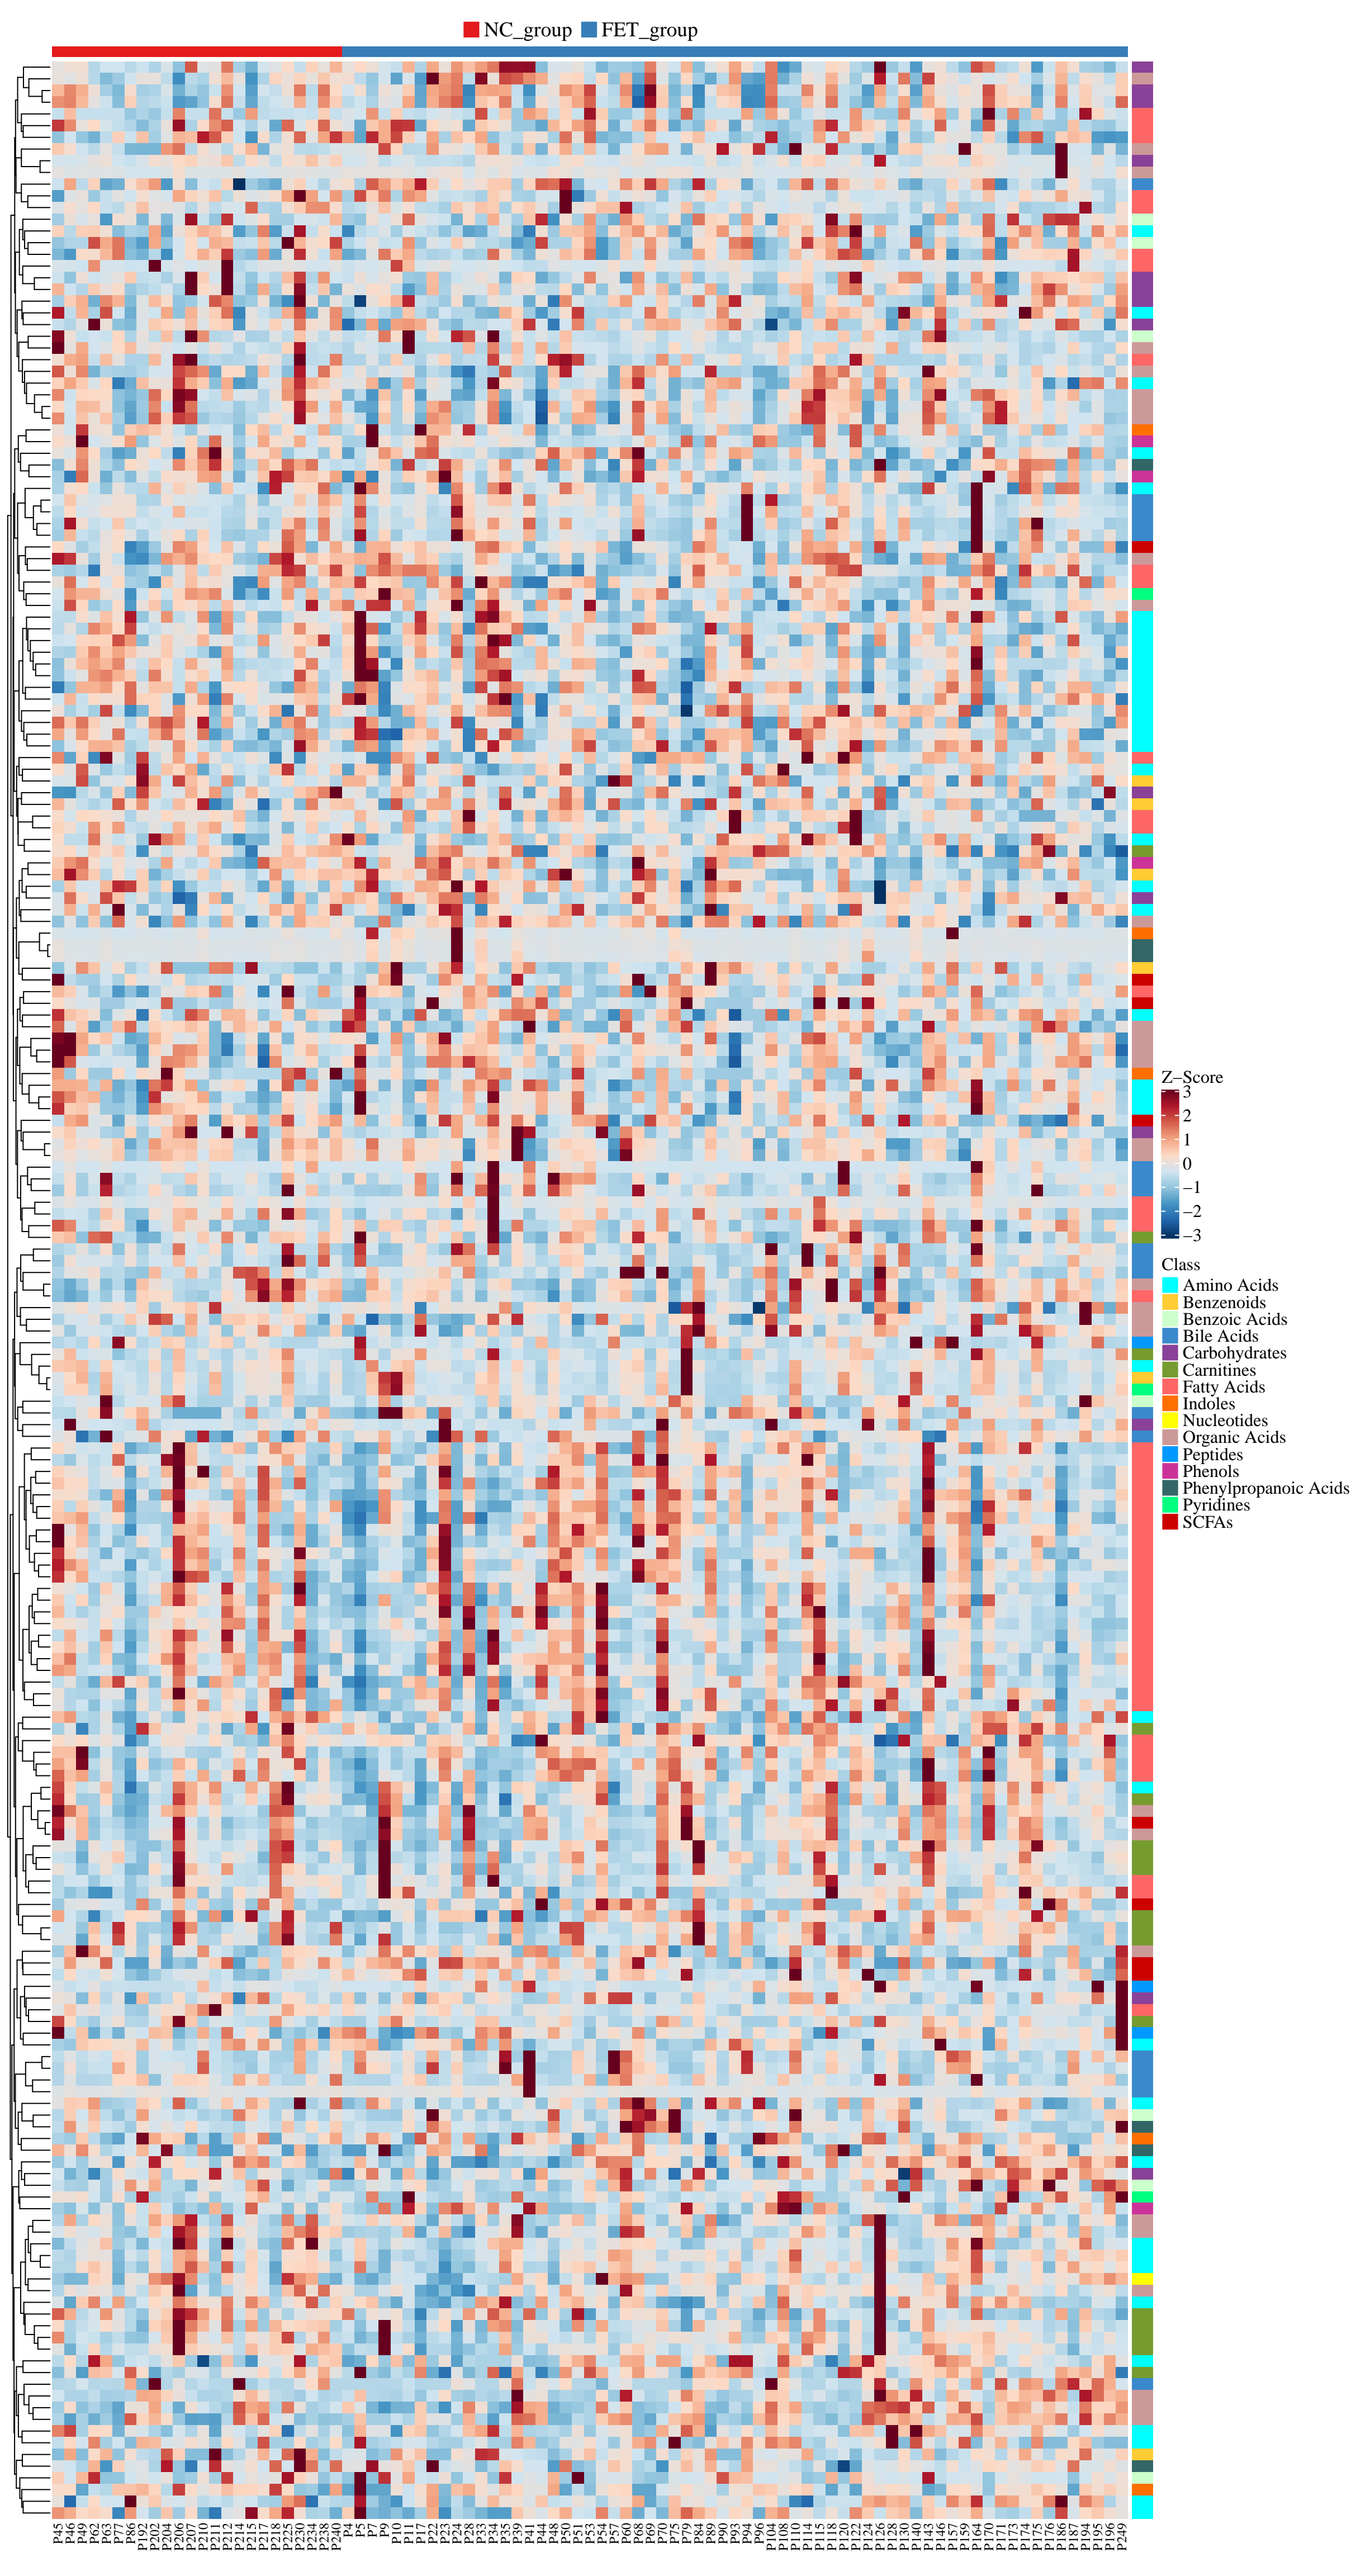

Supplement: s1 [file s1]
